# Supplementary material
Source: Springer Nature journal article supplement (https://www.springermedizin.de/resource/supplementary/12902_2008_69_MOESM1_ESM.pdf/9516170)

**A**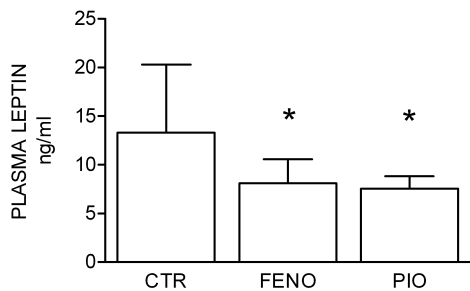**B**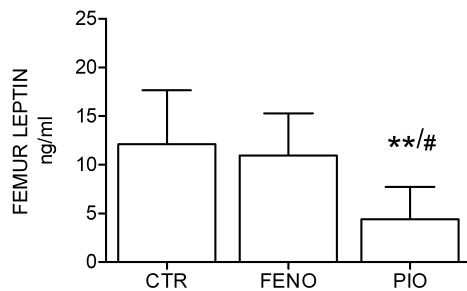**C**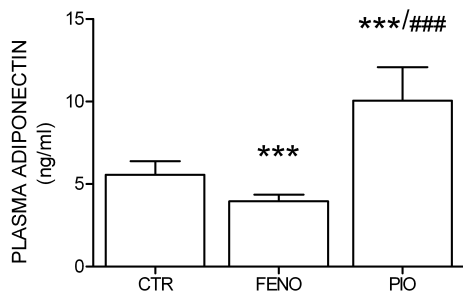**D**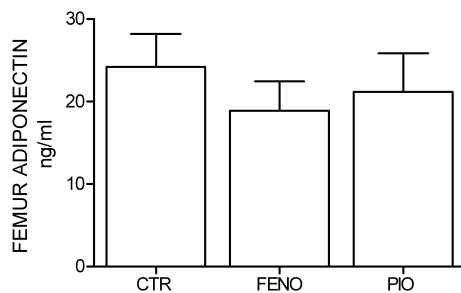**E**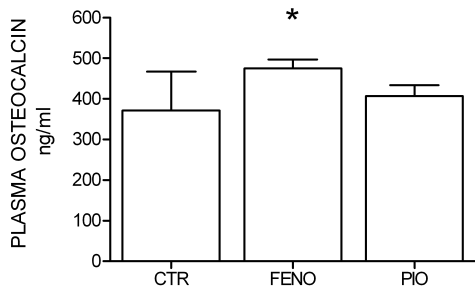**F**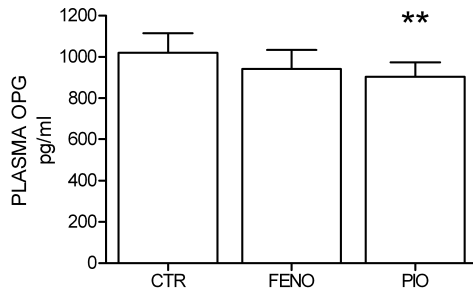

Supplement: MOESM1 [file 9516170]
